# Supplementary material
Source: publisher figshare collection journal article supplement (https://sage.figshare.com/ndownloader/files/13569692)
Supplement: Supplementary file 1 [file 13569692]

## SUPPLEMENTARY MATERIAL 1: EMAIL SURVEY USED TO IDENTIFY INTERVENTIONS

**Email title: Rehabilitation for visual field loss after stroke: what is being used?**

**Dear** (names inserted)

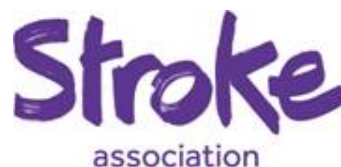

I started my PhD project into rehabilitation for visual field loss 9 months ago. It is funded by The Stroke Association and will provide important data to inform trials into useful and feasible rehabilitation interventions for visual field deficits.

The focus of my project is the training methods health professionals can use to improve eye movements in those with visual field loss. There are two main intervention types:

**1. Scanning training:** This uses specific eye exercises that aim to improve eye movements. Training is for set, limited time periods and often uses a piece of equipment, for example an electronic device or paper-based aid.

**2. Compensatory strategies and advice:** This uses everyday tasks as training. The person is shown how to use scanning in daily life contexts (for example eating or grooming activities). Strategies to achieve better eye movements include verbal instructions, cues and item placement.

**MY PROJECT IS ABOUT SCANNING TRAINING ONLY (not compensatory strategies and advice.)**

I would like to invite you to help me in 2 ways:

1. Tell me about the scanning training interventions you know of
2. Passing this email on

### **I. Tell me about the scanning training interventions you know of**

- I want to gather as much information as possible about scanning training interventions.
- Please tell me about **every** scanning training intervention you are aware of.
- Please include those currently in use by you or colleagues.

For each scanning intervention identified, I am going to systematically assess the eye movements they train and their suitability for use by stroke survivors.

Please **copy the box below as many times as you need, fill in and email it back** to me:

---

Name of scanning training:

(if you know the name)

Brief Description:

Is it designed specifically for visual field loss after stroke?    Yes    No

(delete as required)

Are you happy to receive a further email about the project?    Yes    No

(delete as required)

**RETURN TO: [christine.hazelton@gcu.ac.uk](mailto:christine.hazelton@gcu.ac.uk)**

---

## **2. Passing this email on**

- I am using a "snowball" strategy. This means that I would like this request to be **passed on to other people who also have an interest in vision problems after stroke.**
- Visual field loss can be addressed by a wide variety of healthcare professionals, so it's not easy to find out their opinions.
- By cascading this email on to your relevant contacts you can help me reach a wide range of professionals who may know of different scanning training tools and devices: this range of expertise, experience and information is vital.
- I am sending this email to members of the Scottish Vision and Stroke Network as a starting point for the snowball.

This information is really important to my study - **please send this email on!**

Thanks very much for your time and your help with this. I will be accepting responses until the end

of August. All information provided will be treated confidentially and data anonymised. Storage of electronic data will be within Glasgow Caledonian University's secure network, which is backed up on a daily basis. If you would like any further information, please let me know.

Thanks again,

Christine

[christine.hazelton@gcu.ac.uk](mailto:christine.hazelton@gcu.ac.uk)
